# Supplementary material
Source: PubMed Central journal article supplement (PMC4618483)
Supplement: NIHMS728613-supplement-01.pdf [file NIHMS728613-supplement-01.pdf]

292 **Supplemental Table:** HIV-1 Subtype E-specific polymerase chain reaction primers and  
 293 multiplex identifiers (MID)-containing adaptors for 454-pyrosequencing

| <b>Primers</b>                            | <b>Sequence</b>              | <b>HXB2 Location</b> |
|-------------------------------------------|------------------------------|----------------------|
| LTR 5'                                    | GCCTCAATAAAGCTTGCCTTGA       |                      |
| LTR 3'                                    | GGCGCCACTGCTAGAGATTTT        |                      |
| 1 <sup>st</sup> round forward             | AAATGATGACAGCATGTCAGGGAGT    | 1823 – 1847          |
| 1 <sup>st</sup> round reverse             | GGGAATTTCTGTATATCATTGACAGTCA | 3303 – 3328          |
| 2 <sup>nd</sup> round, Amplicon 1 forward | GTAAACAGTGGCCATTGACAGA       | 2610 – 2632          |
| 2 <sup>nd</sup> round, Amplicon 1 reverse | ACTAGGTATGGTGAATGCAGTATA     | 2928 – 2951          |
| 2 <sup>nd</sup> round, Amplicon 2 forward | CACAGGGATGGAAAGGATCAC        | 2998 – 3018          |
| 2 <sup>nd</sup> round, Amplicon 2 reverse | CTGGACTGTCCATYTGTCAGGATG     | 3252 - 3275          |
| <b>Multiplex Identifier ^</b>             |                              |                      |
| MID1                                      | ACGAGTGCCT                   |                      |
| MID2                                      | ACGCTCGACA                   |                      |
| MID3                                      | AGACGCACTC                   |                      |
| MID4                                      | AGCACTGTAG                   |                      |
| MID5                                      | ATCAGACACG                   |                      |
| MID6                                      | ATATCGCGAG                   |                      |
| MID7                                      | CGTGTCTCTA                   |                      |
| MID8                                      | CTCGCGTGTC                   |                      |
| MID9                                      | TAGTATCAGC                   |                      |
| MID10                                     | TCTCTATGCG                   |                      |
| MID11                                     | TGATACGTCT                   |                      |
| MID12                                     | TACTGAGCTA                   |                      |
| MID13                                     | CATAGTAGTG                   |                      |
| MID14                                     | CGAGAGATAC                   |                      |

294

295 ^ - Per 454 sequencing system guidelines for amplicon experimental design, May 2011

296
